# Supplementary material
Source: bioRxiv or medRxiv preprint supplement (https://www.biorxiv.org/highwire/filestream/36446/field_highwire_adjunct_files/17/124321-25.pdf)

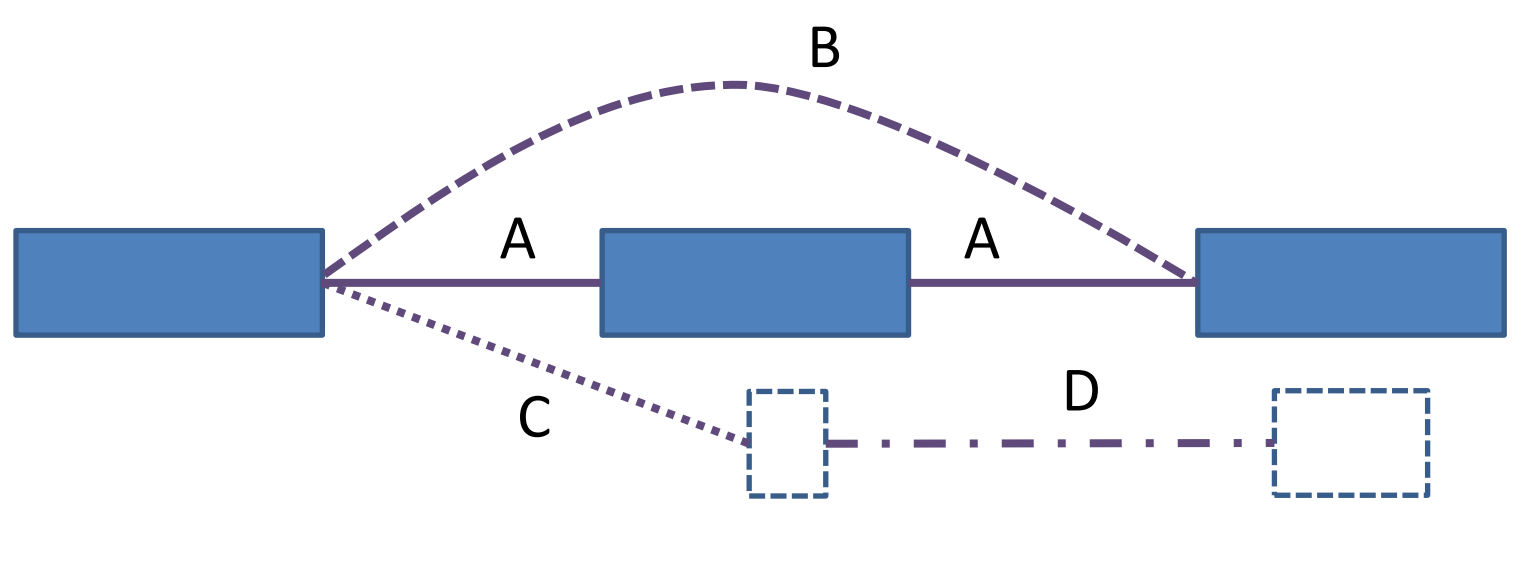

Supplement: Supplementary file [file 124321-25.pdf]
